# Supplementary material for: Effects of a Psychobiotic Supplement on Serum Brain-derived Neurotrophic Factor Levels in Depressive Patients: A Post Hoc Analysis of a Randomized Clinical Trial
Source: PubMed Central journal article supplement — J Neurogastroenterol Motil. 2020 Sep 30;26(4):486–95. doi: 10.5056/jnm20079 (PMC7547201; doi:10.5056/jnm20079), 2020-09-30
Supplement: JNM-26-486_Supple.pdf [file JNM-26-486_Supple.pdf]

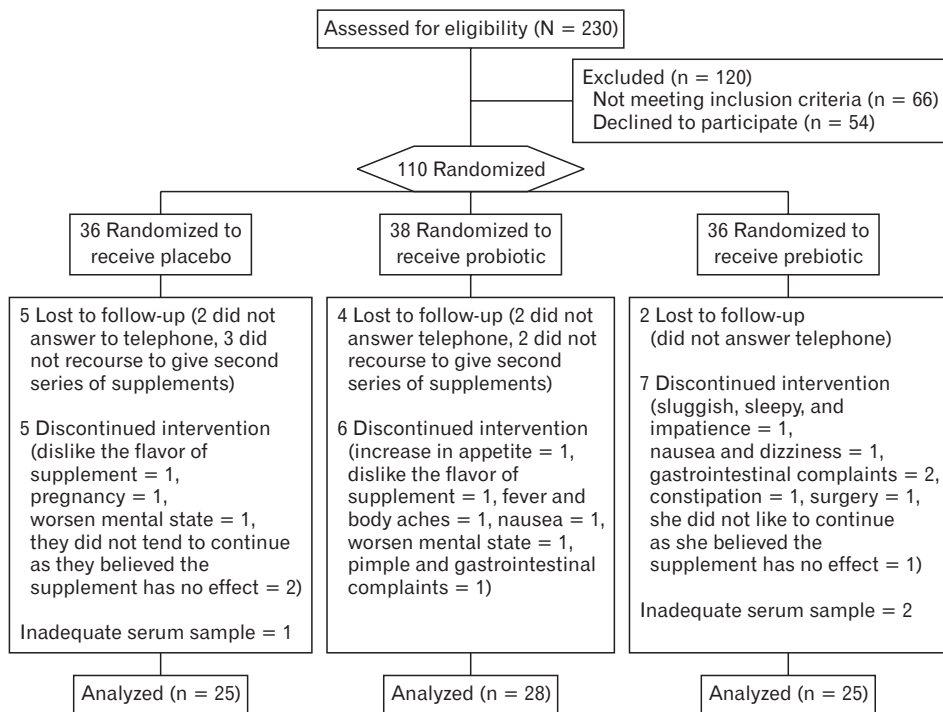

**Supplementary Figure.** Flow diagram summarizing the enrollment and follow-up of participants.

**Supplementary Table 1.** Dietary Intake and Physical Activity of the *Post Hoc* Population at Baseline and Endpoint

| Variables        | Probiotic (n = 28) |                | Prebiotic (n = 25) |                | Placebo (n = 25) |                | P-value |
|------------------|--------------------|----------------|--------------------|----------------|------------------|----------------|---------|
|                  | Baseline           | End            | Baseline           | End            | Baseline         | End            |         |
| Energy (kcal)    | 1585.5 ± 300.1     | 1647.7 ± 330.8 | 1466.2 ± 422.5     | 1380.2 ± 403.0 | 1415.6 ± 429.5   | 1463.9 ± 434.0 | 0.120   |
| Protein (%)      | 13.3 ± 2.4         | 13.5 ± 2.7     | 14.4 ± 2.1         | 14.8 ± 3.0     | 14.9 ± 2.3       | 15.4 ± 5.1     | 0.290   |
| Fat (%)          | 28.2 ± 7.8         | 29.6 ± 5.9     | 29.5 ± 7.5         | 28.7 ± 7.8     | 29.8 ± 5.2       | 32.3 ± 6.4     | 0.301   |
| CHO (%)          | 57.9 ± 7.95        | 57.6 ± 6.4     | 56.2 ± 7.1         | 56.1 ± 8.6     | 55.4 ± 6.4       | 52.4 ± 9.1     | 0.180   |
| Fiber (g)        | 13.4 ± 6.8         | 12.1 ± 5.5     | 10.1 ± 4.8         | 11.7 ± 6.1     | 11.2 ± 3.1       | 10.6 ± 4.5     | 0.710   |
| Cholesterol (mg) | 182.6 ± 84.9       | 212.4 ± 117.5  | 190.7 ± 138.0      | 167.2 ± 101.4  | 207.1 ± 205.1    | 189.3 ± 251.5  | 0.720   |
| Magnesium (mg)   | 158.8 ± 55.7       | 162.5 ± 44.5   | 137.3 ± 44.6       | 157.7 ± 62.2   | 140.7 ± 60.9     | 133.8 ± 43.2   | 0.250   |
| Zinc (mg)        | 5.3 ± 1.3          | 5.7 ± 1.9      | 5.7 ± 2.6          | 5.7 ± 2.9      | 5.9 ± 2.6        | 6.5 ± 3.0      | 0.600   |
| Selenium (µg)    | 0.09 ± 0.05        | 0.06 ± 0.2     | 0.06 ± 0.03        | 0.08 ± 0.04    | 0.06 ± 0.04      | 0.07 ± 0.03    | 0.220   |
| Vitamin E (mg)   | 6.4 ± 3.7          | 3.6 ± 3.9      | 3.0 ± 3.5          | 4.4 ± 6.7      | 3.5 ± 3.2        | 4.4 ± 6.7      | 0.760   |
| Vitamin C (mg)   | 75.6 ± 65.2        | 70.4 ± 133.8   | 91.4 ± 79.6        | 105.5 ± 105.2  | 72.0 ± 54.2      | 72.4 ± 47.1    | 0.450   |
| MET (hr/wk)      | 21.1 ± 23.2        | 16.6 ± 14.9    | 20.1 ± 17.9        | 15.7 ± 11.0    | 20.4 ± 22.2      | 16.9 ± 17.7    | 0.800   |

CHO, carbohydrate; MET, metabolic equivalents.

Data are expressed as mean ± SD.

P-values obtained from ANOVA/ANCOVA adjusted for baseline values.

**Supplementary Table 2.** Pairwise Comparison of the Groups (*Post Hoc* Per-protocol Population)

| Dietary intakes | Probiotic and Prebiotic | Probiotic and Placebo | Prebiotic and Placebo |
|-----------------|-------------------------|-----------------------|-----------------------|
| Energy (kcal)   | 0.040                   | 0.180                 | 0.020                 |
| Protein (%)     | 0.170                   | 0.171                 | 0.681                 |
| Fat (%)         | 0.141                   | 0.210                 | 0.160                 |
| CHO (%)         | 0.550                   | 0.060                 | 0.240                 |
| Fiber           | 0.850                   | 0.260                 | 0.350                 |
| PUFA            | 0.311                   | 0.402                 | 0.811                 |
| MUFA            | 0.111                   | 0.360                 | 0.140                 |
| SFA             | 0.070                   | 0.670                 | 0.031                 |
| Cholesterol     | 0.231                   | 0.041                 | 0.730                 |
| Mg              | 0.790                   | 0.070                 | 0.220                 |
| Zn              | 0.660                   | 0.360                 | 0.420                 |
| Se              | 0.030                   | 0.152                 | 0.731                 |
| Vitamin E       | 0.671                   | 0.520                 | 0.730                 |
| Vitamin C       | 0.771                   | 0.360                 | 0.281                 |

CHO, carbohydrate; PUFA, polyunsaturated fatty acids; MUFA, monounsaturated fatty acids; SFA, saturated fatty acids; Mg, magnesium; Zn, zinc; Se, selenium.

Data are expressed as *P*-values. ANOVA/ANCOVA analysis adjusted for baseline values. *P* < 0.05 is considered significant.
